1 **Evasion of Toll-like Receptor Recognition by *Escherichia coli* is mediated via**  
2 **Population Level Regulation of Flagellin Production**

3

4 **Short Title:** TLR5 Evasion by Uropathogenic *E. coli*

5

6 **Author Names:** M Lanz<sup>1,\*</sup>, C Birchall<sup>1,\*</sup>, L Drage<sup>1,\*</sup>, D Picton<sup>1,\*</sup>, C Mowbray<sup>1,\*</sup>, Q Alsenani<sup>1,\*</sup>,  
7 A. Tan<sup>1</sup>, A Ali<sup>1&2</sup>, C Harding<sup>2,3</sup>, R Pickard<sup>2,3†</sup>, J Hall<sup>1,§</sup>, PD Aldridge<sup>1,§</sup>

8

9 Addresses:

- 10 1. Biosciences Institute, Newcastle University, UK  
11 2. Translational and Clinical Research Institute, Newcastle University, UK  
12 3. Urology Department, Freeman Hospital, Newcastle upon Tyne Hospitals NHS  
13 Foundation Trust, UK

14

15 \* Contributed equally

16 † Died 2018

17 § co-corresponding authors

18

19 **Key words:** UTI; TLR5; UPEC; Flagellin

20

21 Corresponding author for contact:

22 Phillip D Aldridge

23 [phillip.aldridge@ncl.ac.uk](mailto:phillip.aldridge@ncl.ac.uk)

24 Biosciences Institute, Faculty Medical Sciences, Newcastle University, UK

25

26

27 **Abstract (300)**

28 Uropathogenic *Escherichia coli* (UPEC) is a major cause of urinary tract infections. Analysis  
29 of the innate immune response in immortalised urothelial cells suggests that the bacterial  
30 flagellar subunit, flagellin, is key in inducing host defences. A panel of 40 clinical uro-  
31 associated *Escherichia coli* isolates recovered from either asymptomatic bacteruria (ASB),  
32 cystitis or pyelonephritis patients, were characterised for motility and their ability to induce  
33 an innate response in urothelial cells stably transfected with a NFκB luciferase reporter.  
34 Twenty-four isolates (60%) were identified as motile with strains recovered from cystitis  
35 patients exhibiting a bipolar motility distribution pattern ( $P < 0.005$ ) and associated with a 2-  
36 5 fold increase in NFκB signalling. Although two isolates were associated with swarm sizes  
37 of  $>7$  cm and NFκB activities of  $>30$  fold ( $P = 0.029$ ), data overall suggested bacterial motility  
38 and the NFκB signalling response were not directly correlated. To explore whether the  
39 signalling response reflected antigenic variation flagellin was purified from 11 different  
40 isolates and the urothelial cell challenges repeated. Purified flagellin filaments generated  
41 comparable ( $30.4 \pm 1.8$  to  $46.1 \pm 2.5$  fold,  $P = \text{NS}$ ) NFκB signalling responses, irrespective of  
42 either the source of the isolate or H-serotype. These data argued against any variability  
43 between isolates being related to flagellin itself. To determine the roles, if any, of flagellar  
44 abundance in inducing these responses flagellar hook numbers of a range of cystitis and  
45 ABU isolates were quantified using a plasmid encoded flagellar hook gene *flgEA240C*. Foci  
46 data suggested isolates were averaging between 1 and 2 flagella per cell, while only 10 to  
47 60% each isolates population exhibited foci. These data suggested selective pressures exist  
48 in the urinary tract that allow uro-associated *E. coli* strains to maintain motility exploiting  
49 population heterogeneity to prevent host TLR5 recognition.

50

## 51 **Introduction**

52

53 Urinary tract infections (UTIs) are among the most common bacterial infections suffered by  
54 individuals of all ages. They affect an estimated 150 million people worldwide including  
55 children, young adults and older populations (1). Infections are often painful and debilitating,  
56 associated with a wide range of pathogens, but the majority (70-80%) link to the bacterial  
57 uropathogen *Escherichia coli* (2). Regardless of the uropathogen, treatment options remain  
58 limited with antibiotics being the first choice therapeutic. Treatment consequences, namely  
59 multi-drug resistant bacteria, often underpin persistent or rUTIs and has driven the urologic  
60 community to work collaboratively to adopt antibiotic stewardship programmes (3)

61

62 Research to date suggests UTIs link to genotypic and phenotypic variation in both the host  
63 and the uropathogen (4,5). At present it is assumed that the relationship between an  
64 individual's susceptibility and bacterial virulence determines the balance between tolerance  
65 of invading pathogens and the mounting of an immune response, which in turn dictates the  
66 course of infection and subsequent recurrence (6-8). *Escherichia coli* reside naturally in the  
67 gastrointestinal tract, but are able to migrate from the anus, colonise the vaginal and  
68 periurethral areas, then ascend to the bladder causing asymptomatic infection (ABU) or  
69 acute cystitis (5). However, our understanding of the associated host-microbe interactions  
70 is compounded by the observation that the same or related strains can lead to both  
71 symptomatic UTI and ABU. One outcome is that ABU patients, particularly the elderly, are  
72 often given antibiotics without justification due to clinical uncertainty (1).

73

74 While UPEC harbour a large array of virulence determinants, the ability to cause disease is  
75 dependent on the ability of the bacterium to ascend the urinary tract through adherence  
76 (fimbriae driven) and flagella-based motility (2). Moreover *in vivo* studies using genetically

77 engineered UPEC strains and mice UTI models support flagella as being a key factor in the  
78 aetiology of an UTI (9-11). The bacterial flagellum is a macromolecular, self-assembling  
79 nano-machine whose genetics, assembly process and mechanisms of action during host-  
80 microbe interactions are well-documented (12-17). *E. coli* is known to produce 2-8 flagella  
81 per cell arranged peritrichously across the cell surface and, is characterised genetically, by  
82 approximately 60 flagellar genes organised into three loci: *flg*, *flh* and *fli* that function to  
83 orchestrate flagellar assembly and rotation (18). Evidence supports flagellar assembly and  
84 function to be coupled to flagellar gene expression by a complex transcriptional hierarchy  
85 (19). Additionally, tight control of flagellar gene expression enables *E. coli* to efficiently pass-  
86 through ON/OFF phases of motility that can be exploited and used advantageously during  
87 host-microbe interactions (20).

88

89 In humans, uropathogens such as UPEC are sensed via TLR5 receptors, which detect  
90 flagellin: the major subunit of the flagellum filament (21). TLR5 activation results in the rapid  
91 release of urothelial host defence agents including cytokines and defensins that function  
92 individually or collectively to kill potential uropathogens (22,23). However, using urine and  
93 employing *in vitro* chemotaxis assays Herrmann and Burman (1985) reported that only 68%  
94 (19/28) of *E. coli* isolates associated with cystitis, or an UTI, were motile (24). Yet, there is  
95 strong evidence to support uropathogenic *E. coli* (UPEC) exploiting flagellar-mediated  
96 movement to establish the initial ascending colonisation of the bladder from the urethra  
97 (11,25). Lane et al (2005) and Wright et al (2005) both concluded that motility provided  
98 UPEC a competitive advantage over non-motile UPEC strains in establishing an UTI in  
99 murine models. A key challenge therefore is to understand what triggers potential  
100 uropathogenic bacteria to regulate their motility, ascend the urethra and infect the bladder.

101

102 Using clinically derived uro-associated *E. coli* isolates data are presented suggesting a  
103 regulatory mechanism linked to population heterogeneity that maintains motility within a  
104 bacterial population, but at levels below a threshold required for innate immune recognition.  
105

106 **Results**

107  
108 *Uro-associated E. coli motility and the urothelial innate response.*

109  
110 Forty uro-associated *E. coli* isolates were curated from patients presenting with either  
111 cystitis, pyelonephritis, asymptomatic bacteriuria (ABU) or UTI-associated bacteraemia.  
112 Semi-quantitative agar assays measuring the size of a bacterial swarm after 8 hrs (Figure  
113 1A) were used to assess motility of these isolates and 24 (60%) were identified as motile  
114 (Fig 1A & B, Table S1). In general, the swarms of isolates recovered from ABU patients  
115 measured between 0.8 and 5.4 cm, while cystitis strains exhibited a bipolar motility  
116 distribution pattern with strains swarming less (n=6) or greater (n=4) than 5.4 cm  
117 respectively (Fig 1B; P < 0.005).

118  
119 The impact of bacterial motility on the urothelial innate response was assessed *in vitro* using  
120 heat-killed isolates ( $1 \times 10^5$  CFU/ml) and bladder RT4 cells stably transfected with a NF $\kappa$ B  
121 luciferase reporter (26). Following these challenges 33 (83%) of all the isolates were  
122 associated with a 2-5 fold increase in NF $\kappa$ B signalling (Fig 1B & C), with 7 of the motile  
123 isolates associated with increases of >5-fold. Two isolates recovered from cystitis patients  
124 were associated with NF $\kappa$ B activities of >30 fold (Fig 1C; P = 0.029) and swarm sizes of >7  
125 cm (Fig 1B). These data suggested that bacterial motility linked to a NF $\kappa$ B signalling  
126 response, but that the two were not directly correlated.

127  
128 *Urothelial responses to flagellins prepared from uro-associated E. coli isolates*

129  
130 UTIs are ascending infections and urothelial cells respond to potential uropathogens via  
131 flagellin detection, TLR5 signalling and the release of antimicrobial killing and pro-

132 inflammatory agents (26). TLR5 proteins recognise a conserved motif found in the majority  
133 of flagellins (27), which in *E. coli* is referred to as the H-antigen with to date 53 flagellin or  
134 H-serotypes being identified (28) (Table S1). To explore whether the signalling response  
135 reflected antigenic variation flagellin was purified from 11 different uro-associated *E. coli*  
136 isolates (Table S1: Lab IDs PYL3398-PYL3424) and the urothelial cell challenges repeated  
137 (Fig 2A). Purified flagellin filaments generated robust and comparable ( $30.4 \pm 1.8$  to  $46.1 \pm 2.5$   
138 fold,  $P = \text{NS}$ ) NF $\kappa$ B signalling responses, irrespective of either the source of the isolate or  
139 H-serotype. These data argued against any variability between isolates being related to  
140 flagellin itself.

141

142 TLR-signalling activates a complex signalling cascade that leads to the degradation of I $\kappa$ B $\alpha$   
143 and NF $\kappa$ B release that activates gene expression (29). Smith et al (2003) using transfected  
144 Chinese hamster ovary cells, showed TLR5 recognition of flagellin to be dose-dependent  
145 (30). A dose-dependent response to flagellin, measured through I $\kappa$ B $\alpha$  protein levels and  
146 NF $\kappa$ B induction was also observed in RT4 urothelial cells (Fig 2B and C). Interestingly, using  
147 purified flagellin from *E. coli* UTI3408 experiments suggested a peak response at  
148 approximately 2.5 ng/ml.

149

150 *Urothelial responses to outer membranes prepared from uro-associated E. coli isolates*

151

152 Data from *in vitro* and *in vivo* studies, both murine and clinical, suggest TLR4 signalling as  
153 well as TLR5 impacts UTI host-microbe interactions (21,31-33). TLR4 recognises  
154 lipopolysaccharide, the major outer membrane (OM) component of Gram-negative bacterial  
155 species such as UPEC (34). Therefore, the potential roles of TLR4 and LPS were explored  
156 to help explain the differing NF $\kappa$ B signalling responses observed during whole bacterial cell  
157 challenges. Outer membrane preparations of four clinical isolates (3 motile [PYL3398,

158 UTI3408 and UTI3412] (Table S1) and 1 non-motile [ABU3416]) and two control strains  
159 NCTC10418 and CFT073, were used to challenge RT4 (TLR<sup>+</sup>) cells and RT4 cells where  
160 either TLR4 or TLR5 expression had been inhibited by siRNA knockdown (Fig 2D). The  
161 innate response was determined through measurement of the pro-inflammatory cytokine IL-  
162 8. Data presented in Fig 2D showed that the IL-8 responses to flagellin (50 ng/ml) and whole  
163 bacterial cell challenges were significantly reduced in the TLR5<sup>siRNA</sup> cells (P = 0.0013). While  
164 a two-fold reduction in IL8 was observed in the NCTC14028 challenged TLR4<sup>siRNA</sup> cells.  
165 This decrease was not significant and not mirrored in either the flagellin or CFT073  
166 challenges. Challenges with OM sample preparations supported reduced IL-8  
167 concentrations overall, but again a significant reduction was detected only in the TLR5  
168 silenced cells (Fig 2D P < 0.001). While these data suggested the OM preparations maybe  
169 contaminated with flagellin they also supported minor roles for LPS and TLR4 in the RT4  
170 bladder cell innate response to an acute infection.

171

172 *Correlating urothelial responses to flagellar abundance amongst uro-associated E. coli*  
173 *isolates*

174

175 Data in Fig 1 and 2 indicated that flagellin isolated from a range of uro-associated *E. coli*  
176 induced an innate response as shown by NFκB signalling and effector (IL-8) responses. To  
177 determine the roles, if any, of flagellar abundance in inducing these responses flagellar hook  
178 numbers of cystitis (5), ABU (10) and PYL (1) isolates were quantified (Fig 3A) using the  
179 plasmid encoded flagellar hook gene *flgEA240C* (20). The control *E. coli* strain NCTC10418  
180 averaged 2.5 foci per cell, while foci data suggested the clinical isolates and CFT073 were  
181 averaging between 1 and 2 flagella per cell (P = 0.148) (Fig 3B, x-axis).

182



183 However, only 10 to 60% of the CFT073 and clinical isolate cell populations exhibited  
184 FlgEA240C foci compared to 80% of the NCTC10418 cell population (Fig 3B, y-axis).  
185 Moreover, using NCTC10418 as the control and exploiting IL-8 concentrations resulting from  
186 RT4 urothelial cells challenge experiments, identified a link between flagellar numbers and  
187 the host response (Fig 3C  $P = 0.013$ ). These data suggested selective pressures exist in  
188 the urinary tract that allow uro-associated *E. coli* strains to maintain motility but exploit  
189 population heterogeneity to prevent host TLR5 recognition and bacterial killing.

190

191 The flagellar system is regulated at the expression level by a transcriptional hierarchy  
192 controlled by the master transcriptional regulatory FlhD<sub>4</sub>C<sub>2</sub> (35). FlhD<sub>4</sub>C<sub>2</sub> levels are sensitive  
193 to a wide range of regulatory mechanisms that include transcription, translation and protein  
194 stability (36-39). Population data (Fig 3B) suggested that the number of flagella observed  
195 linked to reduced flagellar gene expression. To examine this further a high copy number  
196 plasmid encoding *flhDC* was transformed into the control strain NCTC10418 and UTI3408  
197 (25% Fla+; 1.66 Fla/cell; 0.19 relative IL-8 production: Table S1). RT4 urothelial cell  
198 challenge experiments performed using these transformed strains showed that increasing  
199 *flhDC* expression supported a two-fold increase in IL-8 concentrations for UTI3408  
200 compared to no change for NCTC10418 (Fig 3D).

201

## 202 Discussion

203

204 Motility is a well-recognised pathogenicity, virulence and/or colonisation factor for a wide  
205 range of bacterial species including uropathogenic *E. coli* (UPEC) (40). However, motility  
206 links to flagellin production, which is the bacterial ligand for the mammalian host receptor  
207 TLR5. TLR5 activation releases host bacterial killing agents including cytokines and  
208 antimicrobial agents that facilitate bacterial killing, and clearance from potential colonisation  
209 and/or infection sites (21,26,30). Data from this study exploiting clinical isolates associated  
210 with UTIs suggest that uro-associated *E. coli* exploit population heterogeneity to maintain  
211 motility, but prevent the TLR5-dependent activation of the host innate immune response  
212 (41). Essentially these bacterial populations manipulate their flagellar production so they can  
213 survive and/or colonise the urinary tract, but remain under the host radar. It has been  
214 reported that *E. coli* swims efficiently with only one flagellum per cell (42) and using a  
215 FlgEA240C foci labelling approach uro-associated clinical isolates and the UPEC model  
216 strain CFT073 cultured *in vitro* were characterised by 1 to 2 flagella per cell (Fig 3). Together  
217 these data support *E. coli* motility and survivability within the lower urinary tract environment.  
218 However, once motility is enhanced through increased flagellar production, modelled *in vitro*  
219 using strain 3408 (Fig 3D), these microbes become visible to urothelial cell TLRs. Detection  
220 is associated with the release of a plethora of host defence molecules, shown here in these  
221 studies by elevated IL-8 concentrations (Fig 3D).

222

223 Flagellar systems have been shown to be subject to multiple regulatory controls (43). For  
224 example, *Salmonella enterica* generates a bipolar Fla<sup>-</sup>/Fla<sup>+</sup> population in response to either  
225 nutritional and/or cell envelope stresses (44) while *Caulobacter crescentus* divides  
226 asymmetrically to produce one motile cell each division, ensuring a subpopulation of motile  
227 progeny within a growing population (45). While urine is a medium that sustains microbial

228 growth, it is well recognised to be nutritionally weak when compared to normal laboratory  
229 growth conditions (46). Therefore, it could be argued that uro-associated *E. coli* completely  
230 switching off flagellin synthesis to evade TLR5 recognition and the host immune response  
231 is not compatible with its survival. However, exploiting population heterogeneity to regulate  
232 environmental flagellin concentrations ensures microbial survivability and potentially host  
233 colonisation. Additionally, the concept that immune evasion i.e. host TLR5 recognition of  
234 flagellin proteins drives uro-associated *E. coli* to downregulate flagellar production may help  
235 unravel the pathogenesis of asymptomatic bacteria, defined as the presence of bacteria in  
236 the urinary tract without inflammatory symptoms.

237

238 It was interesting, however, that following *in vitro* culture the motility and NF $\kappa$ B observations  
239 (Fig 2B) did not differentiate between the ASB and cystitis strains. During active UTIs in  
240 humans it has been reported that infecting bacteria need to divide rapidly to survive the host  
241 innate response. Doubling times have been estimated to be between 17 to 34 minutes and  
242 averaging 22 minutes (47). This rapid growth response characterised by upregulation of  
243 UPEC translational machinery results in high cell densities that are orchestrated to both  
244 overwhelm and escape the host defences (48). The latter is supported by growth  
245 experiments using steady state chemostat cultures where faster growing *E. coli* produce  
246 more flagella (Sim 2017).

247

248 However, a key question relates to the cues in the urogenital tract that trigger increased  
249 growth and UPEC infections. It is generally accepted that low nutrient conditions up-regulate  
250 *E. coli* flagellar synthesis via activation of the *flhDC* operon (49) although other signals  
251 including urine osmolality and pH cannot be ignored (50). Studies in *Salmonella* grown in  
252 low nutrient conditions have shown that non flagellar regulators such as RflP, a regulator  
253 that modulates ClpXP recognition of FlhD<sub>4</sub>C<sub>2</sub>, can impact the master regulator FlhD<sub>4</sub>C<sub>2</sub>

254 activity and hence flagellin synthesis (39,44,49,51). Whether comparable regulators function  
255 to trigger flagellar growth in uro-associated *E.coli* is not known although NarL, ModE, Metj,  
256 GadE and YdeO, all sensors of environmental cues, have been identified as playing  
257 potential roles in infection-specific UPEC gene expression (48).

258

259 Population heterogeneity is not an original concept and has been shown to be exploited by  
260 a number of bacterial species to retain a selective advantage particularly during growth in  
261 specific environmental niches (41,52,53). However, its exploitation by uro-associated *E. coli*  
262 to regulate flagellin synthesis and avoid the host defences is novel. This study was not  
263 designed to identify the regulatory mechanisms functioning to control flagellin synthesis in  
264 the urogenital tract, but environmental and genetic cues including population densities, urine  
265 osmolality and electrolytes, urinary and bacterial metabolites, and pH need to be  
266 investigated further.

267

## 268 **Materials and Methods**

269

### 270 ***Strains and General Microbiology***

271

272 *E. coli* strains used in the study have either been previously described (26). Strains PYL3398  
273 to ABU3710 were a kind donation from the Diagnostic Microbiology Unit at the Freeman  
274 hospital, Newcastle NHS Trust, Newcastle upon Tyne between 2010 and 2012 (Table S1  
275 and S2). No ethics were necessary for the use of these strains as the researchers did not  
276 have access to clinical records and the only information provided by the unit was the type  
277 of UTI associated with each isolate. Strains ABU4738-ABU4745 came from the clinical study  
278 of Drage et al (2019) that was conducted under ethically approved study protocols (ref: REC-  
279 14-NE-0026).

280

281 Strains used during this study were propagated in or on Luria-Bertani (LB) medium using  
282 1.5% agar for plates. Incubation, unless stated otherwise, was overnight at 37°C with liquid  
283 cultures aerated by orbital shaking at 160 rpm. All motility assays were performed by either  
284 direct inoculation using a toothpick or inoculating 3 µl of an overnight culture onto motility  
285 agar (1% Tryptone, 0.5% NaCl, 0.3% Agar) and incubating for 8 hours at 30°C. Images of  
286 motility swarms were digitally captured, and the vertical and horizontal diameter measured  
287 to generate an average swarm distance using ImageJ. All swarm assays were performed  
288 with a minimum of three independent colonies. Transformation of the plasmids *pflhDC* or  
289 *pBADflgEA240C* were performed by electroporation as described previously (20). Selection  
290 for plasmids was performed using either 100 µg/ml Ampicillin or 50 µg/ml Kanamycin.  
291 *pflhDC* was generated by cloning a PCR product using the primers *flhD*-42FBam  
292 [ggcggatccGGGTGCGGCTACGTCGCAC] and *flhC*+616RBam

293 [ggcggatccCGCTGCTGGAGTGTTC] into the high copy number vector pSE280 using  
294 standard cloning techniques.

295

### 296 ***Isolation of Flagellin and Outer membranes***

297 All flagellin and outer membrane (OM) preparations were based on 1 L cultures of strains  
298 grown to an OD<sub>600</sub> of 0.6-0.7. Cells were centrifuged at 3890 g and cell pellets resuspended  
299 in cold 10mM HEPES pH 7.4. For flagellin isolation, cell suspensions were sheared using  
300 an Ultra-Turrax blending stick for 2 minutes set at 13500 rpm. The same protocol was used  
301 prior to OM isolation to reduce flagellin contamination. Blended supernatants were  
302 centrifuged at 100,000 g for 1 hour at 4°C to collect sheared flagellar filaments. The pellets  
303 were washed by repeating this procedure three times. Pellets were resuspended in 10mM  
304 HEPES pH 7.4 and centrifuged at 3890 g to improve the removal of cell debris between  
305 each ultra-centrifuge wash step. The washed flagellin pellets were resuspended in 500 µl  
306 10mM HEPES pH 7.4 and stored at -20°C.

307

308 For outer membrane isolation cell suspensions were lysed using a Constant Systems cell  
309 disruptor at 23kPSI. Lysed cell suspensions were centrifuged at 12000 g at 4°C for 40  
310 minutes, the supernatant layered onto a sucrose gradient and centrifuged at 56000 g for 36  
311 hours at 4°C. Outer membrane fractions were resuspended and washed once in 10mM  
312 HEPES pH7.4. The washed outer membrane fraction was collected by centrifuging at  
313 134000 g for 6 hours at 4°C and the resulting pellet resuspended in 500 µl 10mM HEPES.  
314 The quality of preparations was assessed using standard SDS polyacrylamide gel  
315 electrophoresis.

316

### 317 ***NFκB reporter assay, IL-8 ELISA and Immunoblots***

318 Growth conditions for the bladder RT4 cell line has been previously described (26). All  
319 challenges were performed using 24 well plates seeded with 500,000 cells in 500  $\mu$ l, and  
320 the cells grown until 80-90% confluent. Bladder RT4 cells were challenged in triplicate with  
321 either isolated outer membrane preparations (100 ng/ml protein content), flagellin (0-250  
322 ng/ml) or heat-killed whole cells at 37°C and 5% CO<sub>2</sub> (26). Challenges were stopped after  
323 24 hours, the extracellular media collected and stored at -20°C. Interleukin 8 concentrations  
324 (pg/ml) were assayed using an eBioscience IL-8 ELISA kit following the manufacturer's  
325 instructions. Measurement of RT4 NF $\kappa$ B reporter activity was as previously described (26).  
326 For I $\kappa$ B $\alpha$  immunoblots, challenged RT4 cells were lysed in RIPA Buffer collected, quantified  
327 using a Micro BCA protein assay kit (Thermo) and either stored at -20°C or 10  $\mu$ g used for  
328 immunoblots with an Anti-I $\kappa$ B $\alpha$  antibody (New England Biolabs) (54).

329

### 330 ***Inhibition of TLR4 and TLR5 siRNA expression***

331

332 TLR4 and TLR5 knockdown experiments using RT4 cells and siRNA were performed as  
333 described previously (55). siRNAs used were as follows: s14196 (TLR4) and s14199 (TLR5)  
334 and AM4611 (negative siRNA #1) as a control. All challenges were performed as described  
335 previously and media bathing the cells analysed using an eBioscience IL-8 ELISA kit  
336 following the manufacturer's instructions.

337

### 338 ***Quantification of Flagellar abundance***

339 Expression of *flgEA240C* was analysed following bacterial growth at 37°C in LB media  
340 containing 0.1% arabinose with shaking until an OD<sub>600</sub> of 0.6 to 0.7. Staining of the cells  
341 was performed using AlexaFluor 568 (20). Essentially, bacterial cell suspensions were  
342 immobilised on a 1% agarose padded microscope slide and samples analysed in triplicate  
343 at 100x objective using a Nikon Eclipse Ti inverted microscope capturing both phase

344 contrast (100 ms exposure) and red channel images (1000 ms exposure) at five different  
345 fields of view. Five randomly chosen fields were analysed manually using the ImageJ cell  
346 counter plugin generating data where  $n = 200 - 300$  cells. Foci per cell was averaged across  
347 the five fields of view to enumerate the level of cell flagellation, as well as the distribution of  
348 flagella over the population.

349

### 350 ***Data Analysis and Presentation***

351 Data and statistical analysis were performed using MS Excel including the use of ANOVA.  
352 Images for figure panels were processed and cropped using ImageJ and imported into  
353 Adobe illustrator for formatting. All figures were collated in Adobe illustrator to achieve the  
354 correct resolution.

355



356 **Acknowledgements**

357 The authors would like to express thanks to Prof John Perry and Dr Kathy Walton of the  
358 Diagnostic Microbiology Unit at the Freeman Hospital for the kind gift of *E. coli* isolates  
359 used in this study. Finally, we thank Dr James Connolly for his valuable feedback on draft  
360 versions of this manuscript.

361

362 **Funding Information**

363 Funding for this project has included a Newcastle University William Harker Studentship  
364 for M.L., a BBSRC DTG Ph.D. studentship for C.B., a non-clinical PhD studentship for L.D.  
365 provided by the NIHR Newcastle Biomedical Research Centre awarded to the Newcastle  
366 upon Tyne Hospitals NHS Foundation Trust and Newcastle University, a sponsored  
367 studentship from University of Hail, Saudi Arabia for Q.A., a self-funded PhD thesis aided  
368 by a Newcastle University Overseas Research Scholarship for A.T., and a Wellcome Trust  
369 Clinical Training Fellowship for A.A.. The contribution of D.P. was a self-financed MPhil  
370 thesis project. We are also extremely grateful for the internal Faculty of Medical Science  
371 financial support in the form of bridge funding for C.M.

372

373 **Conflict of Interests**

374 The authors declare that there are no conflicts of interest.

375

376 **Figures and Legends**

377

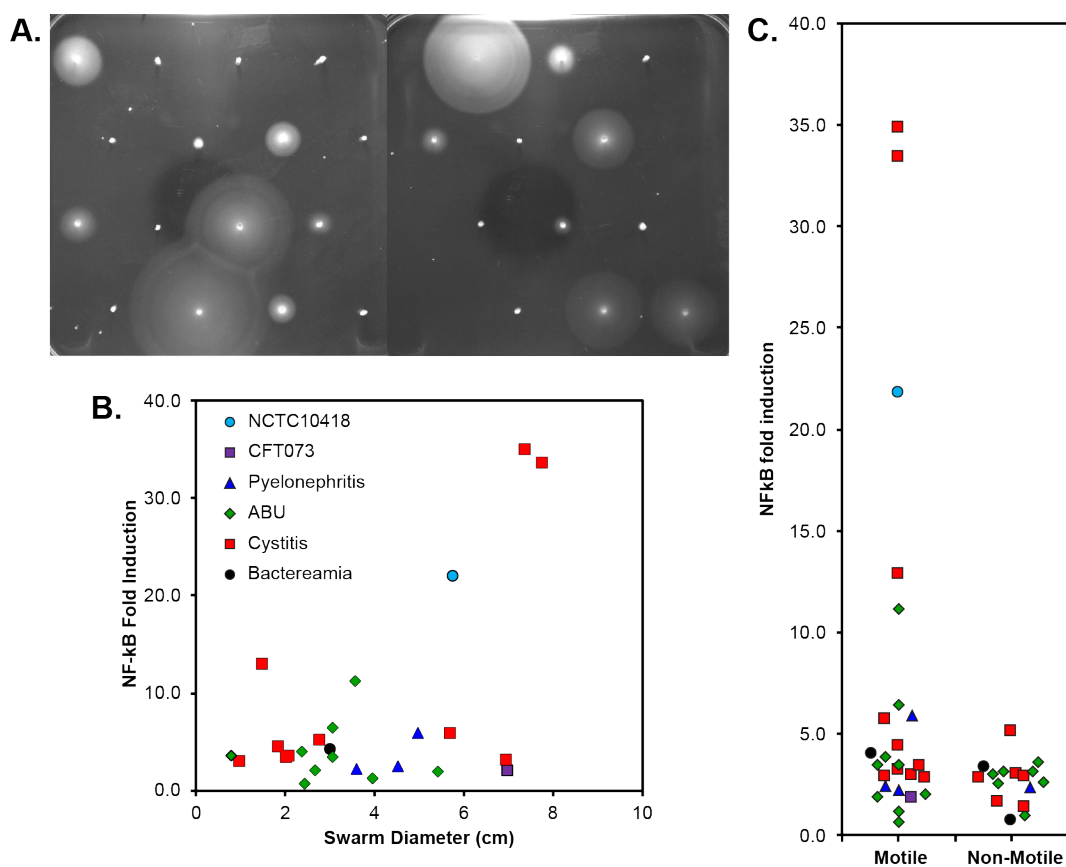

378

379 **Figure 1: Motility of clinical uro-associated isolates and RT4 bladder cell NF-κB**  
380 **signalling. A)** Motility agar assay data of a selection of clinical UPEC isolates (Table S1  
381 and S2) showing the diverse range of phenotypes. **B)** Quantification of swarm diameter for  
382 n=3 independent colonies of each clinical isolate plotted against NFκB induction. Control  
383 strains, NCTC10418 and CFT073, and clinical isolates are colour coded. **C)** NFκB fold  
384 induction of all motile and non-motile UPEC clinical isolates. Points have been scattered left  
385 or right with respect to the x-axis for clarity.

386

387

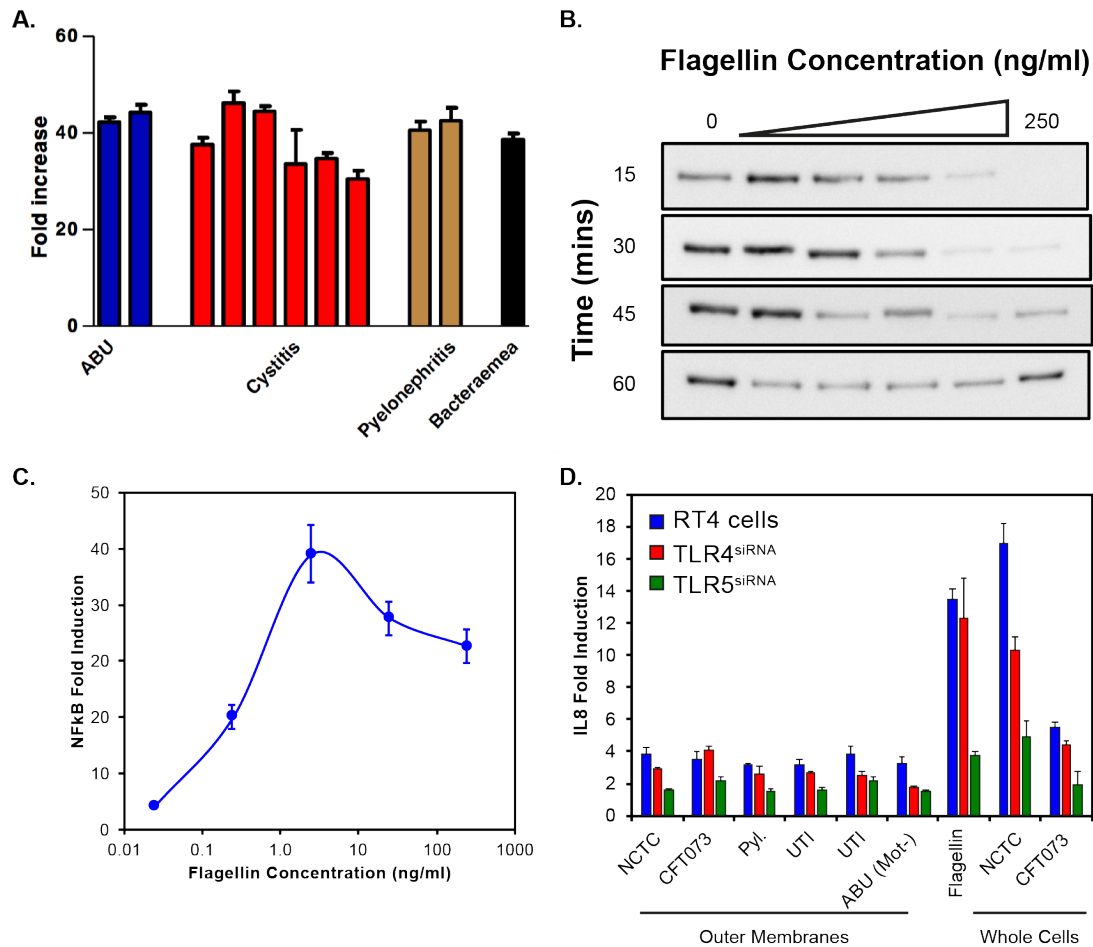

388

389 **Figure 2: NF-κB and IL-8 responses of bladder RT4 cells challenged with flagellin,**  
 390 **bacterial outer membrane preparations and whole cells. A)** NF-κB response of RT4  
 391 bladder cells challenged for 24 hours with flagellin filaments (250 ng/ml) isolated from 11  
 392 different uro-associated *E. coli* (strains PYL3398-PYL3324: Table S1). **B)** Immunoblot  
 393 analysis of IκBα following dose dependent challenges of RT4 cells with flagellin filaments  
 394 isolated UTI3408. **C)** Quantification of NFκB induction following dose dependent challenges  
 395 of RT4 cells with flagellin filaments isolated from UTI3408. Data shown is the average of two  
 396 technical repeats and 3 independent challenges. **D)** IL-8 concentrations of RT4 cell media  
 397 following transfection with siRNAs targeting either TLR4 or TLR5 expression and  
 398 challenging for 24 hours with either outer membrane preparations, flagella filaments (50  
 399 ng/ml) or heat killed whole bacteria.

400

401

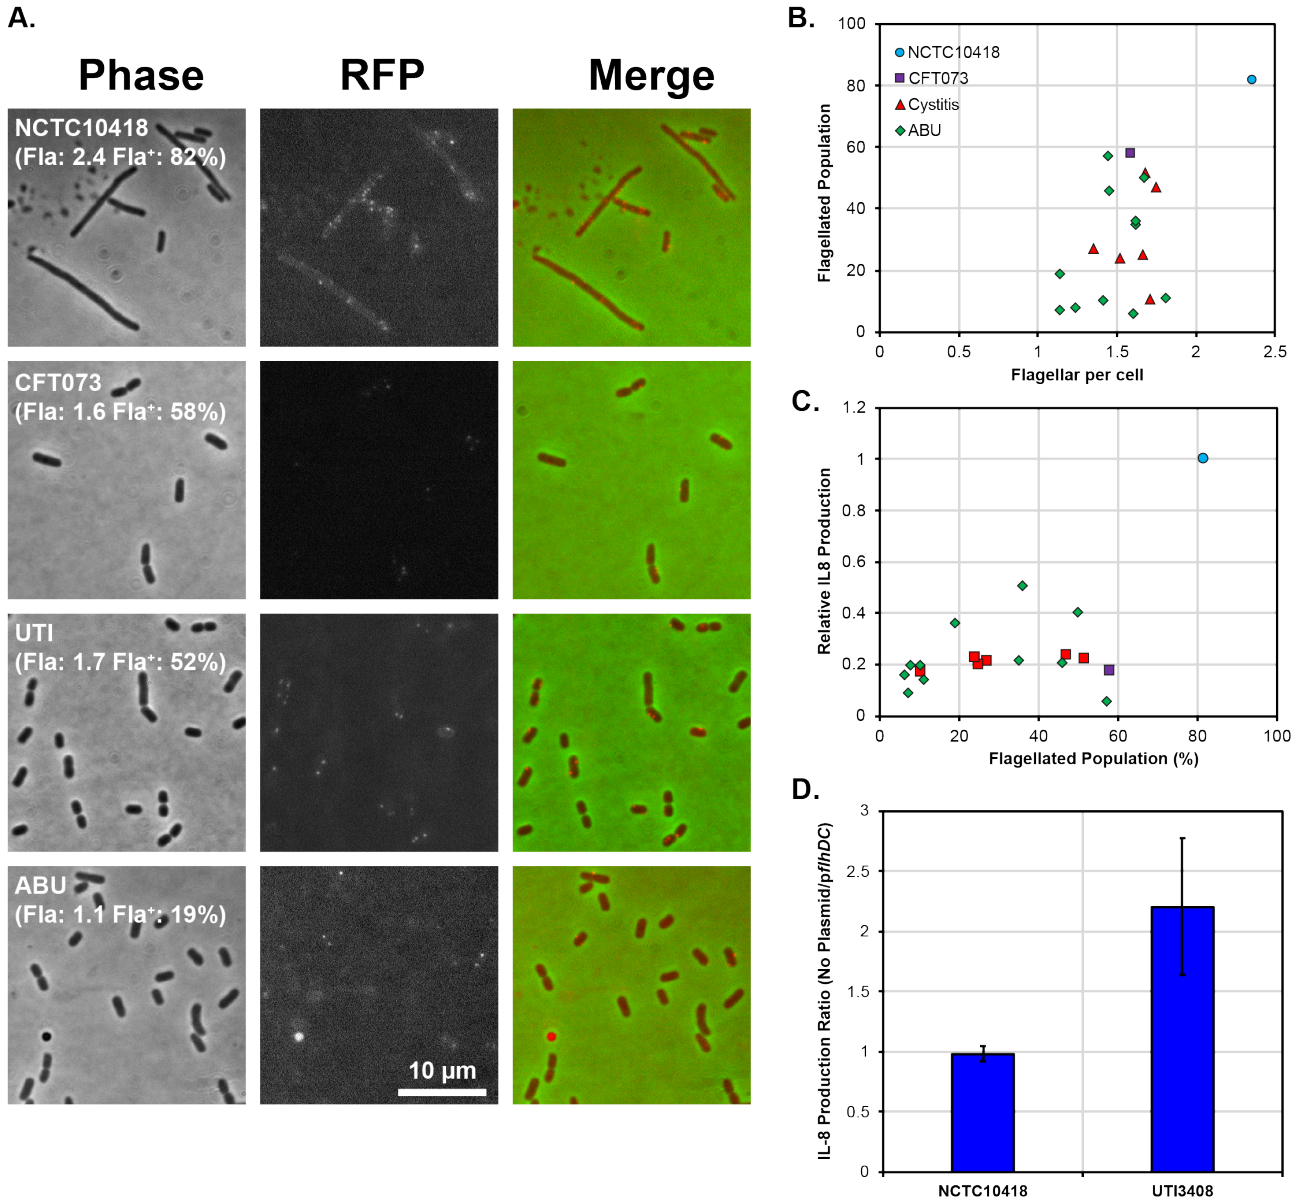

402

403 **Figure 3: Uro-associated *E. coli* population heterogeneity and UPEC evasion of the**  
 404 **TLR5 response. A)** Phase contrast and fluorescent images of FlgEA240C foci in the control  
 405 strains NCTC10418 and CFT073, and two uro-associated clinical isolates. Quantification of  
 406 a minimum of 250 cells per strain is shown in brackets where Fla: = average number of FlgE  
 407 foci per cell and Fla<sup>+</sup>: = percentage of the population with foci. Images are chosen to show  
 408 foci and may not reflect quantified numbers. **B)** Scatter plot showing average foci per cell  
 409 versus flagellated population. The range of average foci per cell for all strains except  
 410 NCTC10418 are within experimental error ( $P = 0.143$ ). **C)** Scatter plot showing percentage  
 411 of flagellated population versus relative NF $\kappa$ B induction (control strain NCTC10418 = 1.0).  
 412 **D)** IL-8 production, presented as a ratio, following challenges of RT4 cells with NCTC10418  
 413 (*pflhDC* -ve) or UTI3408 (*pflhDC* transformed).

414

415

416 **Table S1: Motile Strains and associated data used in this study**

| Lab Strain ID                              | Source*   | Flagellin Serotype | Average swarm diameter (cm) | Flagellar abundance § |                    | Reference  |
|--------------------------------------------|-----------|--------------------|-----------------------------|-----------------------|--------------------|------------|
|                                            |           |                    |                             | Avg Fla / cell        | % Fla <sup>+</sup> |            |
| <i>Strains used in Figure 1, 2 and 3</i>   |           |                    |                             |                       |                    |            |
| 2743                                       | NCTC10418 |                    | 5.78                        | 2.35                  | 82                 | (26)       |
| 3373                                       | CFT073    | H1                 | 7.02                        | 1.59                  | 58                 | (56)       |
| 3398                                       | PYL       | H1                 | 3.59                        | 1.46                  | 7                  | This study |
| 3406                                       | ABU       | H18                | 3.06                        |                       |                    |            |
| 3408                                       | UTI       | H1                 | 5.71                        | 1.66                  | 25                 |            |
| 3409                                       | UTI       | H5                 | 1.87                        |                       |                    |            |
| 3411                                       | UTI       | H6                 | 7.78                        |                       |                    |            |
| 3412                                       | UTI       | H18                | 1.49                        | 1.36                  | 27                 |            |
| 3414                                       | UTI       |                    | 7.39                        |                       |                    |            |
| 3415                                       | BAC       | H5                 | 3.04                        |                       |                    |            |
| 3417                                       | UTI       | H1                 | 2.05                        |                       |                    |            |
| 3419                                       | ABU       | H6                 | 3.56                        |                       |                    |            |
| 3424                                       | PYL       | H18                | 4.98                        |                       |                    |            |
| 3425                                       | PYL       | H1                 | 4.51                        |                       |                    |            |
| 3692                                       | ABU       |                    | 3.07                        |                       |                    |            |
| 3693                                       | ABU       |                    | 2.67                        | 1.24                  | 8                  |            |
| 3694                                       | ABU       |                    | 5.41                        |                       |                    |            |
| 3695                                       | ABU       |                    | 3.96                        | 1.41                  | 10                 |            |
| 3697                                       | ABU       |                    | 2.44                        | 1.60                  | 6                  |            |
| 3698                                       | ABU       |                    | 2.36                        |                       |                    |            |
| 3699                                       | ABU       | H4                 | 0.77                        |                       |                    |            |
| 3701                                       | UTI       | H27                | 2.80                        | 1.68                  | 52                 |            |
| 3702                                       | UTI       | H4                 | 6.97                        | 1.52                  | 24                 |            |
| 3703                                       | UTI       |                    | 1.00                        | 1.71                  | 10                 |            |
| 3704                                       | UTI       |                    | 2.10                        |                       |                    |            |
| 3710                                       | ABU       | H4                 | 2.85                        |                       |                    |            |
| <i>Additional strains used in Figure 3</i> |           |                    |                             |                       |                    |            |
| 4738                                       | ABU       | H5                 | 1.58                        | 1.67                  | 50                 | (8)        |
| 4739                                       | ABU       | H1                 | 2.41                        | 1.62                  | 35                 |            |
| 4740                                       | ABU       | H1                 | 2.25                        | 1.44                  | 57                 |            |
| 4741                                       | ABU       | H18                | 2.10                        | 1.81                  | 11                 |            |
| 4742                                       | ABU       | H18                | 2.25                        | 1.14                  | 19                 |            |
| 4743                                       | ABU       | H5                 | 3.67                        | 1.62                  | 36                 |            |
| 4744                                       | ABU       | H18                | 1.67                        | 1.45                  | 46                 |            |
| 4745                                       | ABU       | H6                 | 2.00                        | 1.14                  | 7                  |            |

417 § Data shown to indicate the strains used in Figure 3

418 \*PYL: Pyelonephritis; ABU: asymptomatic bacteriuria; UTI: Acute cystitis; BAC:

419 Bacteraemia

420 **Table S2 Non-motile strains used in Figures 1 and 2D.**

421

| <b>Lab Strain ID</b> | <b>Source*</b> |
|----------------------|----------------|
| 3399                 | ABU            |
| 3400                 | ABU            |
| 3401                 | UTI            |
| 3402                 | BAC            |
| 3403                 | UTI            |
| 3407                 | UTI            |
| 3410                 | BAC            |
| 3413                 | ABU            |
| 3416                 | ABU            |
| 3418                 | ABU            |
| 3420                 | ABU            |
| 3422                 | PYL            |
| 3696                 | ABU            |
| 3701                 | UTI            |
| 3706                 | UTI            |
| 3707                 | UTI            |

\*See Table S1 descriptors

422

423

## 424 References

- 425 1. Foxman B. Epidemiology of urinary tract infections: incidence, morbidity, and  
426 economic costs. *Am J Med.* 2002 Jul 8;113 Suppl 1A:5S–13S.
- 427 2. Klein RD, Hultgren SJ. Urinary tract infections: microbial pathogenesis, host–  
428 pathogen interactions and new treatment strategies. *Nat Rev Micro.* Springer US;  
429 2020 Feb 18;18:211–26.
- 430 3. Fisher H, Oluboyede Y, Chadwick T, Abdel-Fattah M, Brennand C, Fader M, et al.  
431 Continuous low-dose antibiotic prophylaxis for adults with repeated urinary tract  
432 infections (AnTIC): a randomised, open-label trial. *Lancet Infect Dis.* 2018  
433 Sep;18(9):957–68.
- 434 4. Hawn TR, Scholes D, Wang H, Li SS, Stapleton AE, Janer M, et al. Genetic variation  
435 of the human urinary tract innate immune response and asymptomatic bacteriuria in  
436 women. *PLoS ONE.* Public Library of Science; 2009;4(12):e8300.
- 437 5. Schreiber HL, Conover MS, Chou W-C, Hibbing ME, Manson AL, Dodson KW, et al.  
438 Bacterial virulence phenotypes of *Escherichia coli* and host susceptibility determine  
439 risk for urinary tract infections. *Science Translational Medicine.* American  
440 Association for the Advancement of Science; 2017 Mar 22;9(382):eaaf1283.
- 441 6. Chan CY, John ALS, Abraham SN. Mast Cell Interleukin-10 Drives Localized  
442 Tolerance in Chronic Bladder Infection. *Immunity.* Elsevier Inc; 2013 Feb  
443 21;38(2):349–59.
- 444 7. Choi HW, Bowen SE, Miao Y, Chan CY, Miao EA, Abrink M, et al. Loss of Bladder  
445 Epithelium Induced by Cytolytic Mast Cell Granules. *Immunity.* 2016  
446 Dec;45(6):1258–69.
- 447 8. Drage LKL, Robson W, Mowbray C, Ali A, Perry JD, Walton KE, et al. Elevated urine  
448 IL-10 concentrations associate with *Escherichia coli* persistence in older patients  
449 susceptible to recurrent urinary tract infections. *Immun Ageing.* *Immunity & Ageing*;  
450 2019 Jul 10;16:1–11.
- 451 9. Lane MC, Alteri CJ, Smith SN, Mobley HLT. Expression of flagella is coincident with  
452 uropathogenic *Escherichia coli* ascension to the upper urinary tract. *Proc Natl Acad*  
453 *Sci USA.* 2007 Oct 16;104(42):16669–74.
- 454 10. Lane MC, Lockett V, Monterosso G, Lamphier D, Weinert J, Hebel JR, et al. Role  
455 of motility in the colonization of uropathogenic *Escherichia coli* in the urinary tract.  
456 *Infect Immun.* 2005 Nov;73(11):7644–56.
- 457 11. Wright KJ, Seed PC, Hultgren SJ. Uropathogenic *Escherichia coli* flagella aid in  
458 efficient urinary tract colonization. *Infect Immun.* 2005 Nov;73(11):7657–68.
- 459 12. Chevance FFV, Hughes KT. Coordinating assembly of a bacterial macromolecular  
460 machine. *Nat Rev Micro.* 2008 Jun;6(6):455–65.
- 461 13. Minamino T, Imada K. The bacterial flagellar motor and its structural diversity.  
462 *Trends Microbiol.* 2015 May;23(5):267–74.



- 463 14. Minamino T. Protein export through the bacterial flagellar type III export pathway.  
464 Biochim Biophys Acta. 2014 Aug;1843(8):1642–8.
- 465 15. Porter SL, Wadhams GH, Armitage JP. Signal processing in complex chemotaxis  
466 pathways. Nat Rev Micro. Nature Publishing Group; 2011 Feb 1;9(3):153–65.
- 467 16. Smith TG, Hoover TR. Deciphering bacterial flagellar gene regulatory networks in  
468 the genomic era. Adv Appl Microbiol. 2009;67:257–95.
- 469 17. Snyder LAS, Loman NJ, Fütterer K, Pallen MJ. Bacterial flagellar diversity and  
470 evolution: seek simplicity and distrust it? Trends Microbiol. 2009 Jan;17(1):1–5.
- 471 18. Aldridge P, Hughes KT. Regulation of flagellar assembly. Curr Opin Microbiol. 2002  
472 Apr;5(2):160–5.
- 473 19. Chilcote GS, Hughes KT. Coupling of flagellar gene expression to flagellar assembly  
474 in *Salmonella enterica* serovar Typhimurium and *Escherichia coli*. Microbiol Mol Biol  
475 Rev. 2000 Dec;64(4):694–708.
- 476 20. Sim M, Koirala S, Picton D, Strahl H, Hoskisson PA, Rao CV, et al. Growth rate  
477 control of flagellar assembly in *Escherichia coli* strain RP437. Sci Rep. 2017 Jan  
478 24;7:41189.
- 479 21. Andersen-Nissen E, Hawn TR, Smith KD, Nachman A, Lampano AE, Uematsu S, et  
480 al. Cutting edge: Tlr5<sup>-/-</sup> mice are more susceptible to *Escherichia coli* urinary tract  
481 infection. J Immunol. 2007 Apr 15;178(8):4717–20.
- 482 22. Ali ASM, Townes CL, Hall J, Pickard RS. Maintaining a sterile urinary tract: the role  
483 of antimicrobial peptides. J Urol. 2009 Jul;182(1):21–8.
- 484 23. Sivick KE, Mobley HLT. Waging war against uropathogenic *Escherichia coli*: winning  
485 back the urinary tract. Infect Immun. 2010 Feb;78(2):568–85.
- 486 24. Herrmann B, Burman LG. Pathogenesis of *Escherichia coli* cystitis and  
487 pyelonephritis: apparent lack of significance of bacterial motility and chemotaxis  
488 towards human urine. Infection. 1985 Jan;13(1):4–7.
- 489 25. Schaeffer AJ, Schwan WR, Hultgren SJ, Duncan JL. Relationship of type 1 pilus  
490 expression in *Escherichia coli* to ascending urinary tract infections in mice. Infect  
491 Immun. American Society for Microbiology (ASM); 1987 Feb;55(2):373–80.
- 492 26. Ali ASM, Mowbray C, Lanz M, Stanton A, Bowen S, Varley CL, et al. Targeting  
493 Deficiencies in the TLR5 Mediated Vaginal Response to Treat Female Recurrent  
494 Urinary Tract Infection. Sci Rep. Nature Publishing Group; 2017 Sep 8;7(1):11039.
- 495 27. Andersen-Nissen E, Smith KD, Strobe KL, Barrett SLR, Cookson BT, Logan SM, et  
496 al. Evasion of Toll-like receptor 5 by flagellated bacteria. Proc Natl Acad Sci USA.  
497 2005 Jun 28;102(26):9247–52.
- 498 28. Wang L, Rothemund D, Curd H, Reeves PR. Species-wide variation in the  
499 *Escherichia coli* flagellin (H-antigen) gene. J Bacteriol. 2003 May;185(9):2936–43.



- 500 29. Hayashi F, Smith KD, Ozinsky A, Hawn TR, Yi EC, Goodlett DR, et al. The innate  
501 immune response to bacterial flagellin is mediated by Toll-like receptor 5. *Nature*.  
502 2001 Apr 26;410(6832):1099–103.
- 503 30. Smith KD, Andersen-Nissen E, Hayashi F, Strobe K, Bergman MA, Barrett SLR, et  
504 al. Toll-like receptor 5 recognizes a conserved site on flagellin required for  
505 protofilament formation and bacterial motility. *Nat Immunol*. 2003 Dec;4(12):1247–  
506 53.
- 507 31. Samuelsson P, Hang L, Wullt B, Irijala H, Svanborg C. Toll-like receptor 4 expression  
508 and cytokine responses in the human urinary tract mucosa. *Infect Immun. American*  
509 *Society for Microbiology Journals*; 2004 Jun;72(6):3179–86.
- 510 32. Ragnarsdottir B, Samuelsson M, Gustafsson MCU, Leijonhufvud I, Karpman D,  
511 Svanborg C. Reduced toll-like receptor 4 expression in children with asymptomatic  
512 bacteriuria. *J Infect Dis. Oxford University Press*; 2007 Aug 1;196(3):475–84.
- 513 33. Song J, Bishop BL, Li G, Grady R, Stapleton A, Abraham SN. TLR4-mediated  
514 expulsion of bacteria from infected bladder epithelial cells. *Proc Natl Acad Sci USA*.  
515 2009 Sep 1;106(35):14966–71.
- 516 34. Tapping RI, Akashi S, Miyake K, Godowski PJ, Tobias PS. Toll-Like Receptor 4, But  
517 Not Toll-Like Receptor 2, Is a Signaling Receptor for *Escherichia* and *Salmonella*  
518 Lipopolysaccharides. *The Journal of Immunology*. 2000 Nov 15;165(10):5780–7.
- 519 35. Wang S, Fleming RT, Westbrook EM, Matsumura P, McKay DB. Structure of the  
520 *Escherichia coli* FlhDC complex, a prokaryotic heteromeric regulator of transcription.  
521 *Journal of Molecular Biology*. 2006 Jan 27;355(4):798–808.
- 522 36. Claret L, Hughes C. Rapid Turnover of FlhD and FlhC, the Flagellar Regulon  
523 Transcriptional Activator Proteins, during *Proteus* Swarming. *J Bacteriol*. 2000 Feb  
524 1;182(3):833–6.
- 525 37. Soutourina OA, Bertin PN. Regulation cascade of flagellar expression in Gram-  
526 negative bacteria. *FEMS Microbiol Rev*. 2003 Oct 1;27(4):505–23.
- 527 38. Kitagawa R, Takaya A, Yamamoto T. Dual regulatory pathways of flagellar gene  
528 expression by ClpXP protease in enterohaemorrhagic *Escherichia coli*. *Microbiology*.  
529 2011 Nov 2;157(11):3094–103.
- 530 39. Takaya A, Erhardt M, Karata K, Winterberg K, Yamamoto T, Hughes KT. YdiV: a  
531 dual function protein that targets FlhDC for ClpXP-dependent degradation by  
532 promoting release of DNA-bound FlhDC complex. *Mol Microbiol*. 2012 Mar  
533 2;83(6):1268–84.
- 534 40. Josenhans C, Suerbaum S. The role of motility as a virulence factor in bacteria. *Int J*  
535 *Med Microbiol*. 2002 Mar;291(8):605–14.
- 536 41. Veening J-W, Smits WK, Kuipers OP. Bistability, epigenetics, and bet-hedging in  
537 bacteria. *Annu Rev Microbiol*. 2008;62:193–210.
- 538 42. Mears PJ, Koirala S, Rao CV, Golding I, Chemla YR. *Escherichia coli* swimming is  
539 robust against variations in flagellar number. *Elife*. 2014;3:e01916.

- 540 43. Brown J, Faulds-Pain A, Aldridge P. The coordination of flagellar gene expression  
541 and the flagellar assembly pathway. In: Pili and Flagella: Current Research and  
542 Future Trends. 2009. pp. 99–120.
- 543 44. Koirala S, Mears P, Sim M, Golding I, Chemla YR, Aldridge PD, et al. A Nutrient-  
544 Tunable Bistable Switch Controls Motility in *Salmonella enterica* Serovar  
545 Typhimurium. MBio. 2014;5(5).
- 546 45. Jenal U, Stephens C. The *Caulobacter* cell cycle: timing, spatial organization and  
547 checkpoints. Curr Opin Microbiol. 2002 Dec 1;5(6):558–63.
- 548 46. Alteri CJ, Smith SN, Mobley HLT. Fitness of *Escherichia coli* during urinary tract  
549 infection requires gluconeogenesis and the TCA cycle. PLoS Pathog. 2009  
550 May;5(5):e1000448.
- 551 47. Forsyth VS, Armbruster CE, Smith SN, Pirani A, Springman AC, Walters MS, et al.  
552 Rapid Growth of Uropathogenic *Escherichia coli* during Human Urinary Tract  
553 Infection. MBio. 2018 Mar 6;9(2).
- 554 48. Sintsova A, Frick-Cheng AE, Smith S, Pirani A, Subashchandrabose S, Snitkin ES,  
555 et al. Genetically diverse uropathogenic *Escherichia coli* adopt a common  
556 transcriptional program in patients with UTIs. Elife. 2019 Oct 21;8.
- 557 49. Wada T, Hatamoto Y, Kutsukake K. Functional and expressional analyses of the  
558 anti-FliH/D4C2 factor gene *ydiV* in *Escherichia coli*. Microbiology. 2012 Jun  
559 1;158(Pt\_6):1533–42.
- 560 50. Reitzer L, Zimmern P. Rapid Growth and Metabolism of Uropathogenic *Escherichia*  
561 *coli* in Relation to Urine Composition. Clin Microbiol Rev. 2019 Dec 18;33(1).
- 562 51. Spurbeck RR, Alteri CJ, Himpf SD, Mobley HLT. The Multifunctional Protein, YdiV,  
563 Represses P Fimbriae-Mediated Adherence in Uropathogenic *Escherichia coli*. J  
564 Bacteriol. 2013 May 10.
- 565 52. Stewart MK, Cookson BT. Non-genetic diversity shapes infectious capacity and host  
566 resistance. Trends Microbiol. 2012 Oct;20(10):461–6.
- 567 53. Casadesús J, Low DA. Programmed Heterogeneity: Epigenetic Mechanisms in  
568 Bacteria. Journal of Biological Chemistry. 2013 May 17;288(20):13929–35.
- 569 54. Aldridge P, Jenal U. Cell cycle-dependent degradation of a flagellar motor  
570 component requires a novel-type response regulator. Mol Microbiol. 1999  
571 Apr;32(2):379–91.
- 572 55. Mowbray CA, Shams S, Chung G, Stanton A, Aldridge P, Suchenko A, et al. High  
573 molecular weight hyaluronic acid: a two-pronged protectant against infection of the  
574 urogenital tract? Clin Transl Immunol. 2018 Jun 7;7(6):e1021–11.
- 575 56. Brzuszkiewicz E, Brüggemann H, Liesegang H, Emmerth M, Olschläger T, Nagy G,  
576 et al. How to become a uropathogen: comparative genomic analysis of  
577 extraintestinal pathogenic *Escherichia coli* strains. Proc Natl Acad Sci USA. 2006  
578 Aug 22;103(34):12879–84.

579
